# Supplementary material for: Multiobjective multifactor dimensionality reduction to detect SNP–SNP interactions
Source: Oxford University Press journal article supplement (doi:10.1093/bioinformatics/bty076), 2018-02-16
Supplement: bioinformatics_34_13_2228_s1.doc [file bioinformatics_34_13_2228_s1.doc]

# Supplementary Files

# Multiobjective multifactor dimensionality re-duction to detect SNP–SNP interactions

Cheng-Hong Yang, Li-Yeh Chuang, and Yu-Da Lin

**MDR procedure**

The MDR procedure includes 11 steps as follows:

**Step 1.** The data set is separated into *k* subsets for *k*-fold CV.

**Step 2.** Let the *i*th data set be the testing data and all others the training data, in which *i* is the index of subset in CV.

**Step 3.** Count the total number of samples in the case group (cases) and the total number of samples in the control group (controls) within each multi-factor class in a combination of *n*-factors (*n * 2); for example, for two loci with three genotypes each, there are nine multi-factor classes.

**Step 4.** Compute the ratio between cases and controls in each multi-factor class. If the ratio  1, it is classified into the high risk group; otherwise it is classified into the low risk group.

**Step 5.** Use the high and low risk groups and outcome risk status to compute *TP*, *FP*, *TN* and *FN*.

**Step 6.** Compute the classification error rate of the trained model.

**Step 7.** Repeat for each combination of *n*-factors (*n * 2).

**Step 8.** Select a best trained model according to the minimum classification error rate.

**Step 9.** Record the information of the best model (e.g., *n* factors and its classification error rate) into CVC.

**Step 10.** Repeat steps 2 to 10 until all CV folds are complete.

**Step 11.** Count the frequencies of the best models occurring in CVC, and select the highest frequency model as that providing the best predictive results. Finally, the model is used to compute the average of prediction error rates using *k* testing data.

**Table 1.** Model with marginal effects.

| *MAF* = 0.1, Prevalence = 0.050, *h*2 = 0.031 | | | | | | |
| --- | --- | --- | --- | --- | --- | --- |
| Model 1 | | AA | | Aa | | aa |
| BB | | 0.060 | | 0.010 | | 0.010 |
| Bb | | 0.010 | | 0.208 | | 0.208 |
| bb | | 0.010 | | 0.208 | | 0.208 |
| *MAF* = 0.1, Prevalence = 0.050, *h*2 = 0.014 | | | | | | |
| Model 2 | | AA | | Aa | | aa |
| BB | | 0.061 | | 0.017 | | 0.017 |
| Bb | | 0.017 | | 0.136 | | 0.136 |
| bb | | 0.017 | | 0.136 | | 0.136 |
| *MAF* = 0.1, Prevalence = 0.050, *h*2 = 0.01 | | | | | | |
| Model 3 | | AA | | Aa | | aa |
| BB | | 0.060 | | 0.021 | | 0.021 |
| Bb | | 0.021 | | 0.116 | | 0.116 |
| bb | | 0.021 | | 0.116 | | 0.116 |
| *MAF* = 0.1, Prevalence = 0.046, *h*2 = 0.016 | | | | | | |
| Model 4 | AA | | Aa | | aa | |
| BB | 0.030 | | 0.090 | | 0.070 | |
| Bb | 0.080 | | 0.010 | | 0.040 | |
| bb | 0.090 | | 0.010 | | 0.000 | |
| *MAF* = 0.1, Prevalence = 0.026, *h*2 = 0.009 | | | | | | |
| Model 5 | AA | | Aa | | aa | |
| BB | 0.030 | | 0.010 | | 0.020 | |
| Bb | 0.010 | | 0.090 | | 0.050 | |
| bb | 0.020 | | 0.050 | | 0.070 | |
| *MAF* = 0.1, Prevalence = 0.017, *h*2 = 0.008 | | | | | | |
| Model 6 | AA | | Aa | | aa | |
| BB | 0.020 | | 0.007 | | 0.003 | |
| Bb | 0.005 | | 0.070 | | 0.080 | |
| bb | 0.020 | | 0.001 | | 0.090 | |

**Table 2.** The comparison of MOMDR and SOMDR (LR) in the six models with marginal effects.

| Samples | 1 | 2 | 3 | 4 | 5 | 6 |
| --- | --- | --- | --- | --- | --- | --- |
| 400 | B | T | B | B | T | T |
| 800 | C | C | C | B | C | C |

**Table 3. Models 1 to 10 without marginal effects.**

| *h*2 = 0.2, *MAF* = 0.2 | | | | *h*2 = 0.2, *MAF* = 0.4 | | | |
| --- | --- | --- | --- | --- | --- | --- | --- |
| Model 1 | AA | Aa | aa | Model 6 | AA | Aa | aa |
| BB | 0.428 | 0.757 | 0.812 | BB | 0.356 | 0.891 | 0.809 |
| Bb | 0.788 | 0.132 | 0.044 | Bb | 0.955 | 0.508 | 0.611 |
| bb | 0.559 | 0.548 | 0.373 | bb | 0.617 | 0.755 | 0.63 |
| *h*2 = 0.2, *MAF* = 0.2 | | | | *h*2 = 0.2, *MAF* = 0.4 | | | |
| Model 2 | AA | Aa | aa | Model 7 | AA | Aa | aa |
| BB | 0.507 | 0.842 | 0.605 | BB | 0.086 | 0.536 | 0.641 |
| Bb | 0.845 | 0.162 | 0.629 | Bb | 0.677 | 0.275 | 0.096 |
| bb | 0.581 | 0.678 | 0.729 | bb | 0.219 | 0.413 | 0.712 |
| *h*2 = 0.2, *MAF* = 0.2 | | | | *h*2 = 0.2, *MAF* = 0.4 | | | |
| Model 3 | AA | Aa | aa | Model 8 | AA | Aa | aa |
| BB | 0.577 | 0.247 | 0.428 | BB | 0.855 | 0.339 | 0.772 |
| Bb | 0.227 | 0.928 | 0.578 | Bb | 0.513 | 0.651 | 0.607 |
| bb | 0.586 | 0.262 | 0.158 | bb | 0.25 | 0.999 | 0.154 |
| *h*2 = 0.2, *MAF* = 0.2 | | | | *h*2 = 0.2, *MAF* = 0.4 | | | |
| Model 4 | AA | Aa | aa | Model 9 | AA | Aa | aa |
| BB | 0.340 | 0.637 | 0.654 | BB | 0.506 | 0.838 | 0.024 |
| Bb | 0.689 | 0.017 | 0.041 | Bb | 0.603 | 0.454 | 0.957 |
| bb | 0.242 | 0.866 | 0.403 | bb | 0.729 | 0.427 | 0.753 |
| *h*2 = 0.2, *MAF* = 0.2 | | | | *h*2 = 0.2, *MAF* = 0.4 | | | |
| Model 5 | AA | Aa | aa | Model 10 | AA | Aa | aa |
| BB | 0.387 | 0.726 | 0.734 | BB | 0.393 | 0.764 | 0.664 |
| Bb | 0.749 | 0.090 | 0.034 | Bb | 0.850 | 0.398 | 0.733 |
| bb | 0.551 | 0.401 | 0.724 | bb | 0.406 | 0.927 | 0.147 |

**Table 4. Models 11 to 20 without marginal effects**

| *h*2 = 0.1, *MAF* = 0.2 | | | | *h*2 = 0.1, *MAF* = 0.4 | | | |
| --- | --- | --- | --- | --- | --- | --- | --- |
| Model 11 | AA | Aa | aa | Model 16 | AA | Aa | aa |
| BB | 0.463 | 0.703 | 0.431 | BB | 0.137 | 0.484 | 0.187 |
| Bb | 0.653 | 0.277 | 0.806 | Bb | 0.482 | 0.166 | 0.365 |
| bb | 0.830 | 0.008 | 0.129 | bb | 0.193 | 0.361 | 0.430 |
| *h*2 = 0.1, *MAF* = 0.2 | | | | *h*2 = 0.1, *MAF* = 0.4 | | | |
| Model 12 | AA | Aa | aa | Model 17 | AA | Aa | aa |
| BB | 0.319 | 0.507 | 0.569 | BB | 0.469 | 0.198 | 0.754 |
| Bb | 0.553 | 0.105 | 0.045 | Bb | 0.337 | 0.502 | 0.141 |
| bb | 0.203 | 0.777 | 0.280 | bb | 0.339 | 0.453 | 0.285 |
| *h*2 = 0.1, *MAF* = 0.2 | | | | *h*2 = 0.1, *MAF* = 0.4 | | | |
| Model 13 | AA | Aa | aa | Model 18 | AA | Aa | aa |
| BB | 0.627 | 0.393 | 0.335 | BB | 0.478 | 0.311 | 0.864 |
| Bb | 0.396 | 0.779 | 0.953 | Bb | 0.387 | 0.579 | 0.263 |
| bb | 0.174 | 0.842 | 0.106 | bb | 0.634 | 0.436 | 0.138 |
| *h*2 = 0.1, *MAF* = 0.2 | | | | *h*2 = 0.1, *MAF* = 0.4 | | | |
| Model 14 | AA | Aa | aa | Model 19 | AA | Aa | aa |
| BB | 0.297 | 0.54 | 0.441 | BB | 0.068 | 0.299 | 0.017 |
| Bb | 0.541 | 0.072 | 0.278 | Bb | 0.289 | 0.044 | 0.285 |
| bb | 0.434 | 0.293 | 0.228 | bb | 0.048 | 0.262 | 0.174 |
| *h*2 = 0.1, *MAF* = 0.2 | | | | *h*2 = 0.1, *MAF* = 0.4 | | | |
| Model 15 | AA | Aa | aa | Model 20 | AA | Aa | aa |
| BB | 0.332 | 0.562 | 0.573 | BB | 0.539 | 0.120 | 0.258 |
| Bb | 0.583 | 0.112 | 0.147 | Bb | 0.165 | 0.378 | 0.325 |
| bb | 0.399 | 0.496 | 0.033 | bb | 0.123 | 0.426 | 0.276 |

**Table 5. Models 21 to 30 without marginal effects**

| *h*2 = 0.05, *MAF* = 0.2 | | | | *h*2 = 0.05, *MAF* = 0.4 | | | |
| --- | --- | --- | --- | --- | --- | --- | --- |
| Model 21 | AA | Aa | aa | Model 26 | AA | Aa | aa |
| BB | 0.492 | 0.664 | 0.481 | BB | 0.002 | 0.155 | 0.214 |
| Bb | 0.642 | 0.330 | 0.746 | Bb | 0.199 | 0.071 | 0.022 |
| bb | 0.656 | 0.396 | 0.000 | bb | 0.081 | 0.122 | 0.135 |
| *h*2 = 0.05, *MAF* = 0.2 | | | | *h*2 = 0.05, *MAF* = 0.4 | | | |
| Model 22 | AA | Aa | aa | Model 27 | AA | Aa | aa |
| BB | 0.499 | 0.639 | 0.765 | BB | 0.188 | 0.020 | 0.171 |
| Bb | 0.666 | 0.389 | 0.083 | Bb | 0.032 | 0.174 | 0.059 |
| bb | 0.543 | 0.527 | 0.953 | bb | 0.134 | 0.087 | 0.092 |
| *h*2 = 0.05, *MAF* = 0.2 | | | | *h*2 = 0.05, *MAF* = 0.4 | | | |
| Model 23 | AA | Aa | aa | Model 28 | AA | Aa | aa |
| BB | 0.212 | 0.350 | 0.116 | BB | 0.005 | 0.179 | 0.251 |
| Bb | 0.336 | 0.054 | 0.495 | Bb | 0.211 | 0.100 | 0.026 |
| bb | 0.227 | 0.273 | 0.495 | bb | 0.156 | 0.098 | 0.156 |
| *h*2 = 0.05, *MAF* = 0.2 | | | | *h*2 = 0.05, *MAF* = 0.4 | | | |
| Model 24 | AA | Aa | aa | Model 29 | AA | Aa | aa |
| BB | 0.805 | 0.683 | 0.638 | BB | 0.174 | 0.321 | 0.154 |
| Bb | 0.657 | 0.936 | 0.989 | Bb | 0.223 | 0.254 | 0.245 |
| bb | 0.850 | 0.564 | 0.866 | bb | 0.448 | 0.025 | 0.424 |
| *h*2 = 0.05, *MAF* = 0.2 | | | | *h*2 = 0.05, *MAF* = 0.4 | | | |
| Model 25 | AA | Aa | aa | Model 30 | AA | Aa | aa |
| BB | 0.638 | 0.488 | 0.383 | BB | 0.098 | 0.219 | 0.302 |
| Bb | 0.464 | 0.765 | 0.957 | Bb | 0.302 | 0.126 | 0.121 |
| bb | 0.580 | 0.562 | 0.719 | bb | 0.053 | 0.308 | 0.136 |

**Table 6. Models 31 to 40 without marginal effects**

| *h*2 = 0.025, *MAF* = 0.2 | | | | *h*2 = 0.025, *MAF* = 0.4 | | | |
| --- | --- | --- | --- | --- | --- | --- | --- |
| Model 31 | AA | Aa | aa | Model 36 | AA | Aa | aa |
| BB | 0.495 | 0.415 | 0.657 | BB | 0.002 | 0.155 | 0.214 |
| Bb | 0.429 | 0.616 | 0.121 | Bb | 0.199 | 0.071 | 0.022 |
| bb | 0.552 | 0.331 | 0.419 | bb | 0.081 | 0.122 | 0.135 |
| *h*2 = 0.025, *MAF* = 0.2 | | | | *h*2 = 0.025, *MAF* = 0.4 | | | |
| Model 32 | AA | Aa | aa | Model 37 | AA | Aa | aa |
| BB | 0.592 | 0.691 | 0.743 | BB | 0.188 | 0.020 | 0.171 |
| Bb | 0.712 | 0.493 | 0.419 | Bb | 0.032 | 0.174 | 0.059 |
| bb | 0.580 | 0.746 | 0.504 | bb | 0.134 | 0.087 | 0.092 |
| *h*2 = 0.025, *MAF* = 0.2 | | | | *h*2 = 0.025, *MAF* = 0.4 | | | |
| Model 33 | AA | Aa | aa | Model 38 | AA | Aa | aa |
| BB | 0.108 | 0.194 | 0.186 | BB | 0.005 | 0.179 | 0.251 |
| Bb | 0.196 | 0.037 | 0.045 | Bb | 0.211 | 0.100 | 0.026 |
| bb | 0.172 | 0.073 | 0.130 | bb | 0.156 | 0.098 | 0.156 |
| *h*2 = 0.025, *MAF* = 0.2 | | | | *h*2 = 0.025, *MAF* = 0.4 | | | |
| Model 34 | AA | Aa | aa | Model 39 | AA | Aa | aa |
| BB | 0.112 | 0.186 | 0.128 | BB | 0.174 | 0.321 | 0.154 |
| Bb | 0.193 | 0.024 | 0.138 | Bb | 0.223 | 0.254 | 0.245 |
| bb | 0.079 | 0.236 | 0.251 | bb | 0.448 | 0.025 | 0.424 |
| *h*2 = 0.025, *MAF* = 0.2 | | | | *h*2 = 0.025, *MAF* = 0.4 | | | |
| Model 35 | AA | Aa | aa | Model 40 | AA | Aa | aa |
| BB | 0.272 | 0.192 | 0.185 | BB | 0.098 | 0.219 | 0.302 |
| Bb | 0.172 | 0.367 | 0.390 | Bb | 0.302 | 0.126 | 0.121 |
| bb | 0.345 | 0.069 | 0.005 | bb | 0.053 | 0.308 | 0.136 |

**Table 7**. The comparison of MOMDR and SOMDR (LR) in the 40 models without marginal effects.

| Samples | 1 | 2 | 3 | 4 | 5 | 6 | 7 | 8 | 9 | 10 |
| --- | --- | --- | --- | --- | --- | --- | --- | --- | --- | --- |
| 400 | C | C | C | C | C | C | C | B | C | C |
| 800 |  |  |  |  |  |  |  |  |  |  |
|  | 11 | 12 | 13 | 14 | 15 | 16 | 17 | 18 | 19 | 20 |
| 400 | B | B | B | B | B | B | B | B |  | B |
| 800 | C | B | C | C | C |  | C | B |  |  |
|  | 21 | 22 | 23 | 24 | 25 | 26 | 27 | 28 | 29 | 30 |
| 400 |  |  | T | B | B | C | C | B |  | B |
| 800 | B | B | B | B | B |  |  |  | B | B |
|  | 31 | 32 | 33 | 34 | 35 | 36 | 37 | 38 | 39 | 40 |
| 400 |  |  | B | T |  | B | B | B | B | B |
| 800 | T | T | B | B | B |  |  | B | B | B |

**Table 8.** The comparison of MOMDR and SOMDR (LR) in the eight random models.

| Samples | 1 | 2 | 3 | 4 | 5 | 6 | 7 | 8 |
| --- | --- | --- | --- | --- | --- | --- | --- | --- |
| 400 | T |  | B | T |  | B |  | B |
| 800 | B | T | B | B |  | B |  | C |

**Table 9. Summary of MOMDR results for CAD based on WTCCC data.**

| Locationa | SNP Groups | Related Genes | CCR | LR | *p*-valueb | CVCc | Timesd  (h) |
| --- | --- | --- | --- | --- | --- | --- | --- |
| Chr1 | rs12081961, rs2889481 | KAZN, STUM | 0.878 | 351.8 | <0.0001 | 5/5 | 16.7 |
| Chr2 | rs10210269, rs7592851 | UNKNOWN, NYAP2 | 0.831 | 240.5 | <0.0001 | 5/5 | 18.3 |
| Chr3 | rs17033748, rs743660* | ARPP21, CCR2 | 0.912 | 434.3 | <0.0001 | 5/5 | 13.4 |
|  | rs9872146, rs17033748* | UNKNOWN, ARPP21 | 0.910 | 437.9 | <0.0001 | 5/5 |  |
| Chr4 | rs10856922, rs6812263 | UNKNOWN, LDB2 | 0.829 | 237.8 | <0.0001 | 5/5 | 12.6 |
| Chr5 | rs13167060, rs2438638 | UNKNOWN, UNKNOWN | 0.692 | 130.3 | <0.0001 | 4/5 | 12.3 |
|  | rs10512994, rs2438638 | UNKNOWN, UNKNOWN | 0.715 | 119.8 | <0.0001 | 5/5 |  |
|  | rs10073800, rs2438638 | UNKNOWN, UNKNOWN | 0.764 | 114.0 | <0.0001 | 5/5 |  |
| Chr6 | rs6904744, rs10949552 | UNKNOWN, UNKNOWN | 0.837 | 240.8 | <0.0001 | 5/5 | 12.3 |
| Chr7 | rs10231449, rs954661 | LOC107983953, GRM8 | 0.695 | 93.4 | <0.0001 | 5/5 | 5.5 |
|  | rs10231449, rs1203735 | LOC107983953, SUGCT | 0.710 | 88.7 | <0.0001 | 5/5 |  |
|  | rs10231449, rs30567 | LOC107983953, PDE1C | 0.690 | 97.3 | <0.0001 | 5/5 |  |
|  | rs974320, rs10085433 | LOC101927391, LOC102723446 | 0.720 | 53.1 | <0.0001 | 5/5 |  |
|  | rs6960274, rs274012 | DNAH11, CREB3L2 | 0.675 | 101.5 | <0.0001 | 5/5 |  |
| Chr8 | rs2514588, rs7839003 | SAMD12, LOC105375931 | 0.698 | 140.3 | <0.0001 | 5/5 | 6.7 |
|  | rs16896518, rs7839003 | MATN2, LOC105375931 | 0.776 | 136.9 | <0.0001 | 5/5 |  |
|  | rs7839003, rs7832071 | LOC105375931, NAT2 | 0.774 | 139.1 | <0.0001 | 5/5 |  |
| Chr9 | rs10967512, rs913580 | UNKNOWN, HSD17B3 | 0.812 | 186.6 | <0.0001 | 5/5 | 4.7 |
|  | rs7027431, rs913580 | UNKNOWN, HSD17B3 | 0.725 | 209.0 | <0.0001 | 5/5 |  |
| Chr10 | rs7081404, rs1509971 | SFMBT2, LOC107984205 | 0.758 | 132.7 | <0.0001 | 5/5 | 8.4 |
| Chr11 | rs10769720, rs1496676 | UNKNOWN, UNKNOWN | 0.730 | 76.5 | <0.0001 | 5/5 | 5.5 |
| Chr12 | rs1454640, rs3989940** | UNKNOWN, UNKNOWN | 0.988 | 724.4 | <0.0001 | 5/5 | 5.2 |
| Chr13 | rs1536033, rs17063459 | UNKNOWN, UNKNOWN | 0.838 | 320.4 | <0.0001 | 5/5 | 3.6 |
|  | rs1536033, rs574662 | UNKNOWN, SGCG | 0.836 | 322.5 | <0.0001 | 5/5 |  |
| Chr14 | rs10131977, rs3815550 | UNKNOWN, VASH1 | 0.838 | 278.6 | <0.0001 | 5/5 | 2.9 |
|  | rs10131977, rs1245395 | UNKNOWN, LOC105370420 | 0.822 | 283.8 | <0.0001 | 5/5 |  |
| Chr15 | rs1431240, rs10152504 | AGBL1, EMC7 | 0.744 | 117.6 | <0.0001 | 5/5 | 2.3 |
| Chr16 | rs3104820, rs2076756 | UNKNOWN, NOD2 | 0.819 | 214.4 | <0.0001 | 5/5 | 2.0 |
| Chr17 | rs11871706, rs2318118* | LOC100507351, SP2-AS1 | 0.946 | 537.1 | <0.0001 | 5/5 | 1.5 |
|  | rs6501659, rs2318118* | LINC00469, SP2-AS1 | 0.946 | 534.9 | <0.0001 | 5/5 |  |
| Chr18 | rs2732232, rs17754634 | UNKNOWN, UNKNOWN | 0.838 | 278.9 | <0.0001 | 5/5 | 2.1 |
| Chr19 | rs280500, rs10153460 | TYK2, UNKNOWN | 0.705 | 40.4 | <0.0001 | 5/5 | 0.9 |
|  | rs280500, rs2234360 | TYK2, ZBTB32 | 0.700 | 59.2 | <0.0001 | 5/5 |  |
|  | rs280500, rs11085753 | TYK2, SMARCA4 | 0.701 | 46.0 | <0.0001 | 5/5 |  |
| Chr20 | rs2748666, rs4810120* | UNKNOWN, C20orf85 | 0.923 | 471.4 | <0.0001 | 5/5 | 1.7 |
|  | rs2748666, rs6047624* | UNKNOWN, UNKNOWN | 0.927 | 465.4 | <0.0001 | 5/5 |  |
| Chr21 | rs1153400, rs2827497 | UNKNOWN, LOC107985509 | 0.697 | 42.7 | <0.0001 | 4/5 | 0.6 |
|  | rs17812977, rs2827497 | UNKNOWN, LOC107985509 | 0.703 | 39.2 | <0.0001 | 5/5 |  |
| Chr22 | rs12171267, rs6009850 | LOC105372853, UNKNOWN | 0.736 | 74.6 | <0.0001 | 5/5 | 0.7 |
|  | rs12171267, rs137160 | LOC105372853, EFCAB6 | 0.736 | 75.0 | <0.0001 | 5/5 |  |
|  | rs12171267, rs17245334 | LOC105372853, UNKNOWN | 0.734 | 91.7 | <0.0001 | 5/5 |  |
| ChrX | rs11095812, rs6636113 | UNKNOWN, LINC00632 | 0.743 | 90.5 | <0.0001 | 5/5 | 1.8 |

a: Chr chromosome; b: *p*-value for epistatic interaction is estimated by χ2 test using the raw data sets; c: cross validation consistency; d: MOMDR running time; time unit: hour (h) ; **: the detected SSIs with highest CCR and LR values; *: the detected SSIs with measures of LR > 400 and CCR > 0.9.
